# Supplementary material for: Enhancing the oxide-ionic conductivity of Ba3Mo1+xNb1−2xGexO8.5 at intermediate temperatures: the effect of site-selective Ge4+-substitution
Source: Royal Society of Chemistry journal article supplement (doi:10.1039/d1dt02469h), 2021-01-01
Supplement: d1dt02469h1.pdf [file d1dt02469h1.pdf]

Supporting information for

## **Enhancing oxide-ionic conductivity of $\text{Ba}_3\text{Mo}_{1+x}\text{Nb}_{1-2x}\text{Ge}_x\text{O}_{8.5}$ at intermediate temperatures: the effect of site-selective $\text{Ge}^{4+}$ -substitution**

Zien Cheng,<sup>a</sup> Jia Yang,<sup>b</sup> Pengfei Jiang,<sup>a,\*</sup> He Huang,<sup>a</sup> Ivan da-Silva,<sup>c</sup> Wenliang Gao,<sup>a</sup> Rihong Cong,<sup>a</sup>

Tao Yang<sup>a,\*</sup>

<sup>a</sup> College of Chemistry and Chemical Engineering, Chongqing University, Chongqing 401331, P. R. China

<sup>b</sup> School of Chemistry and Chemical Engineering, Yangtze Normal University, Chongqing 408100, P. R. China

<sup>c</sup> ISIS Facility, Rutherford Appleton Laboratory, Chilton, Didcot, OX110QX, United Kingdom

\* E-mail: pengfeijiang@cqu.edu.cn, taoyang@cqu.edu.cn.

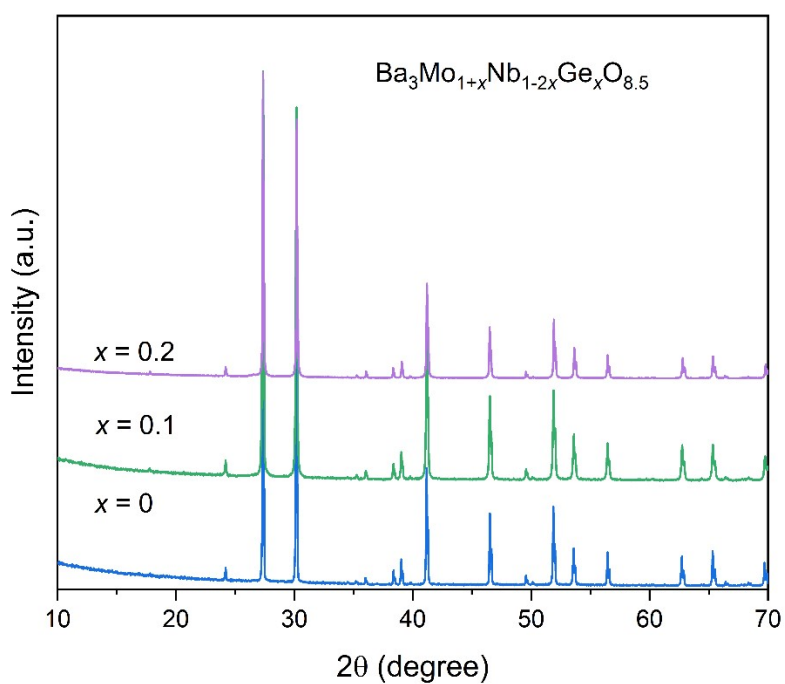

Figure S1. Powder X-ray diffraction patterns of  $\text{Ba}_3\text{Mo}_{1+x}\text{Nb}_{1-2x}\text{Ge}_x\text{O}_{8.5}$  ( $x \leq 0.2$ )

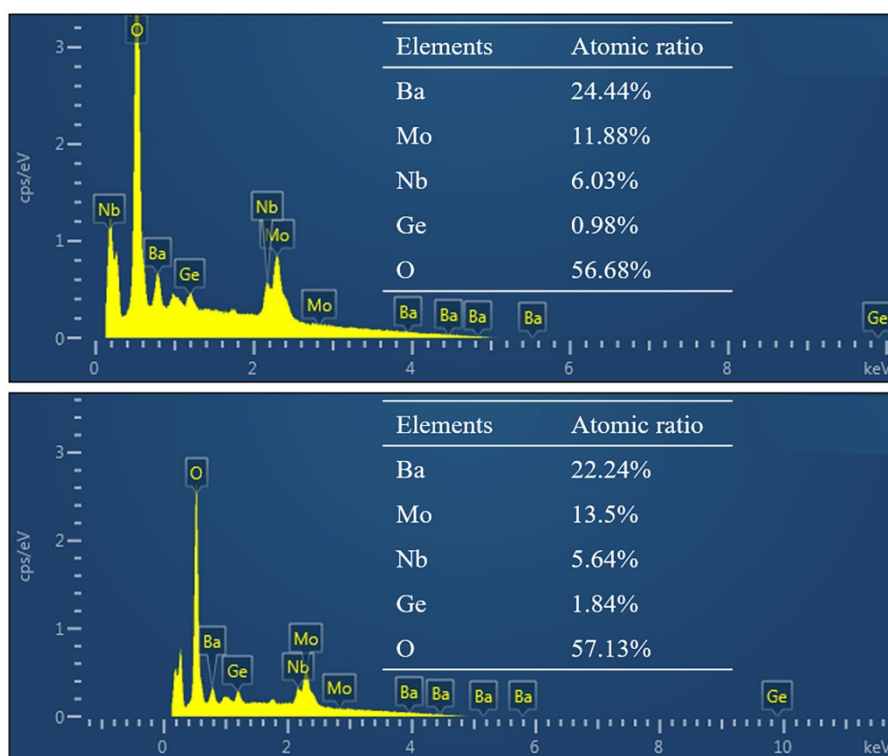

Figure S2. The Energy Dispersive X-ray (EDX) spectra for  $\text{Ba}_3\text{Mo}_{1.2}\text{Nb}_{0.6}\text{Ge}_{0.2}\text{O}_{8.5}$  recorded on two particles. The insets show the detected atomic ratios.

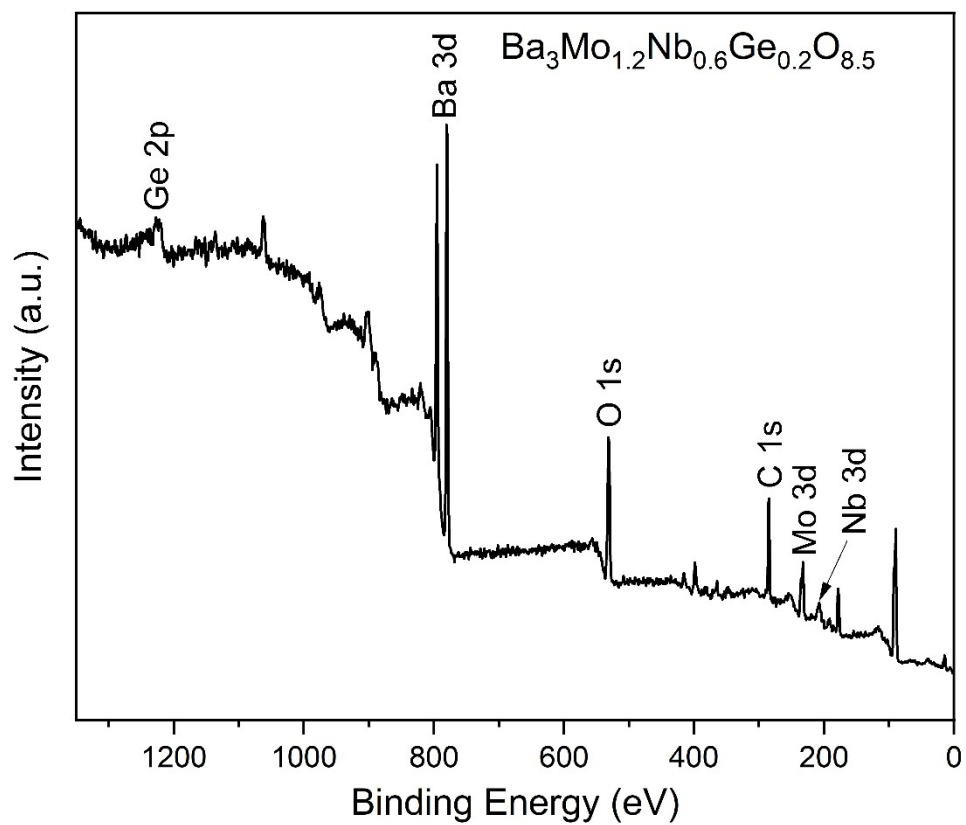

Figure S3. The survey XPS of  $\text{Ba}_3\text{Mo}_{1.2}\text{Nb}_{0.6}\text{Ge}_{0.2}\text{O}_{8.5}$ .

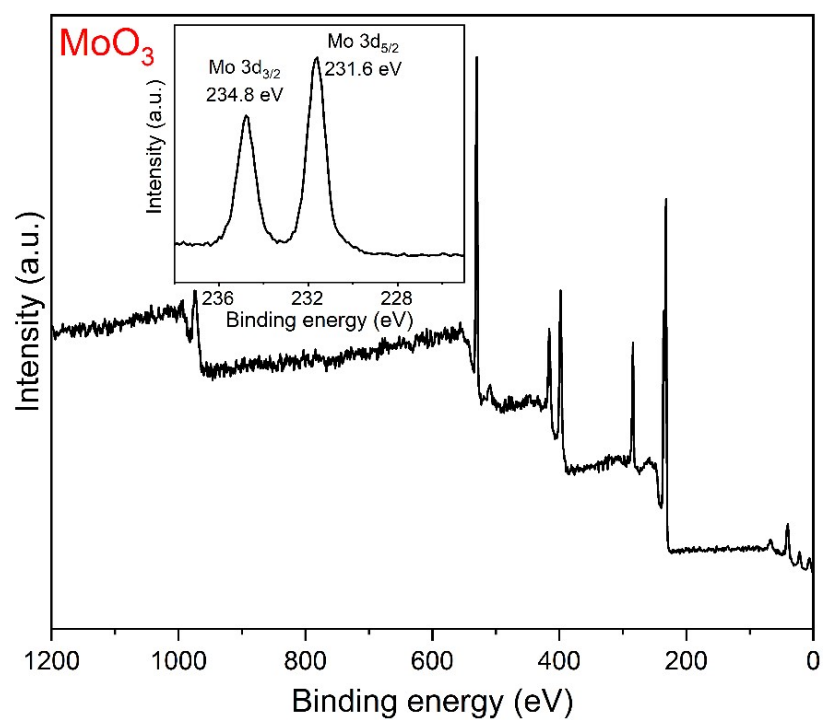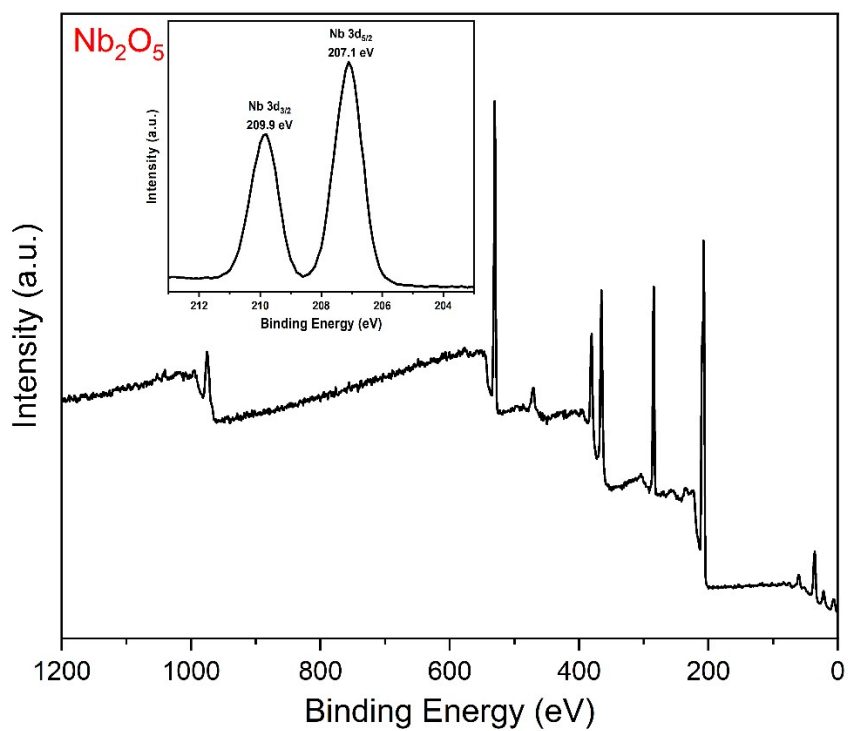

Figure S4. The survey XPS of MoO<sub>3</sub> and Nb<sub>2</sub>O<sub>5</sub>. The inset shows the Mo 3d and Nb 3d signals.

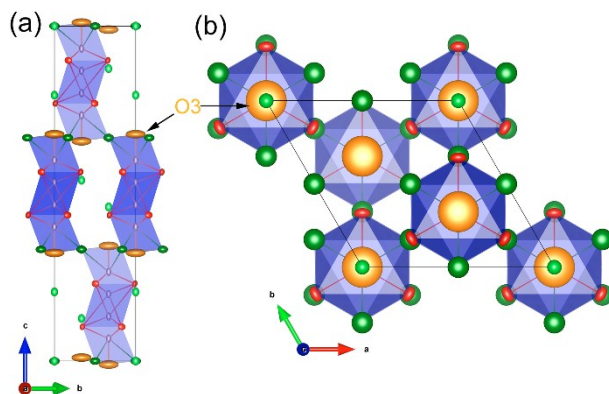

Figure S5. Crystal structure of  $\text{Ba}_3\text{Mo}_{1.2}\text{Nb}_{0.6}\text{Ge}_{0.2}\text{O}_{8.5}$  with atomic displacement ellipsoids drawn at 50% probability.

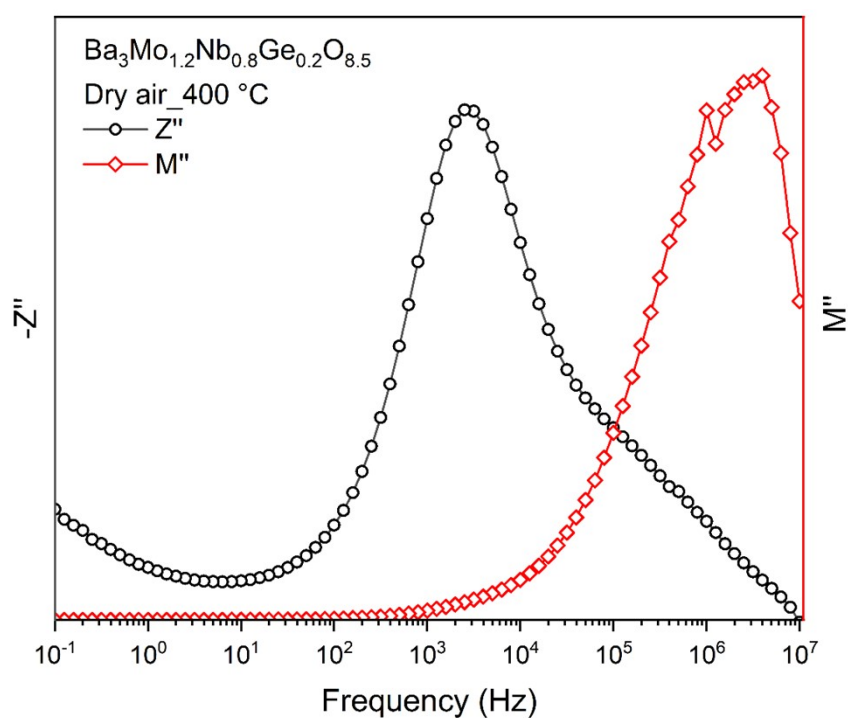

Figure S6. Plots of the imaginary part of the impedance ( $Z''$ ) and electrical modulus ( $M''$ ) along with frequency.

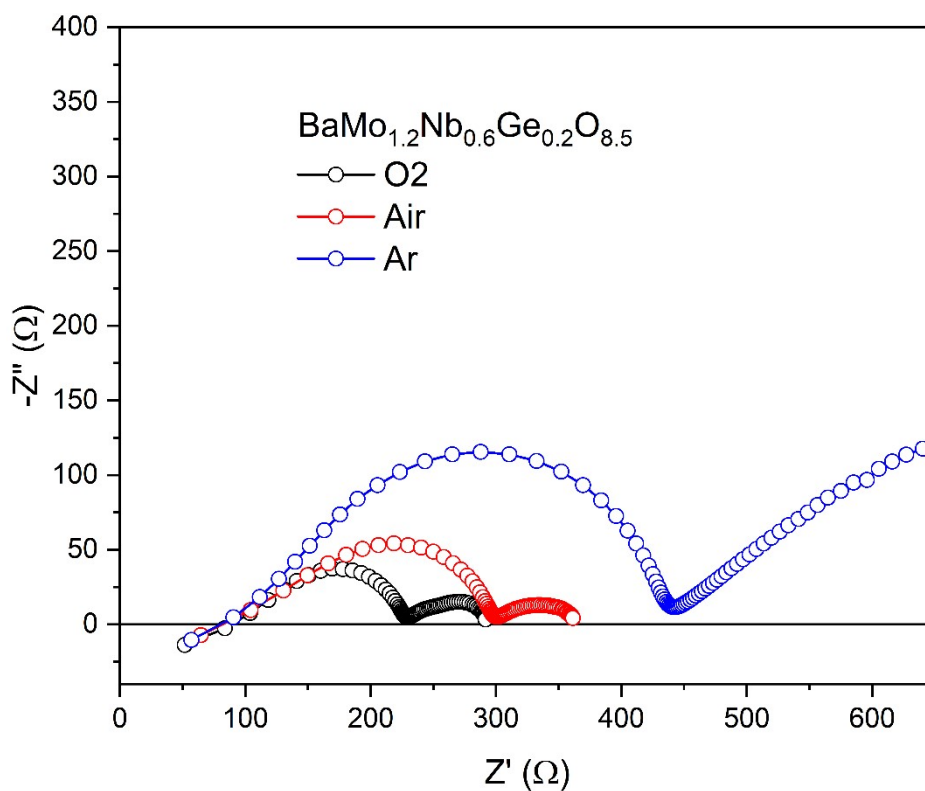

Figure S7. Complex impedance plots of  $\text{Ba}_3\text{Mo}_{1.2}\text{Nb}_{0.6}\text{Ge}_{0.2}\text{O}_{8.5}$  recorded in dry air,  $\text{O}_2$ , and Ar atmospheres at  $550\text{ }^\circ\text{C}$ .

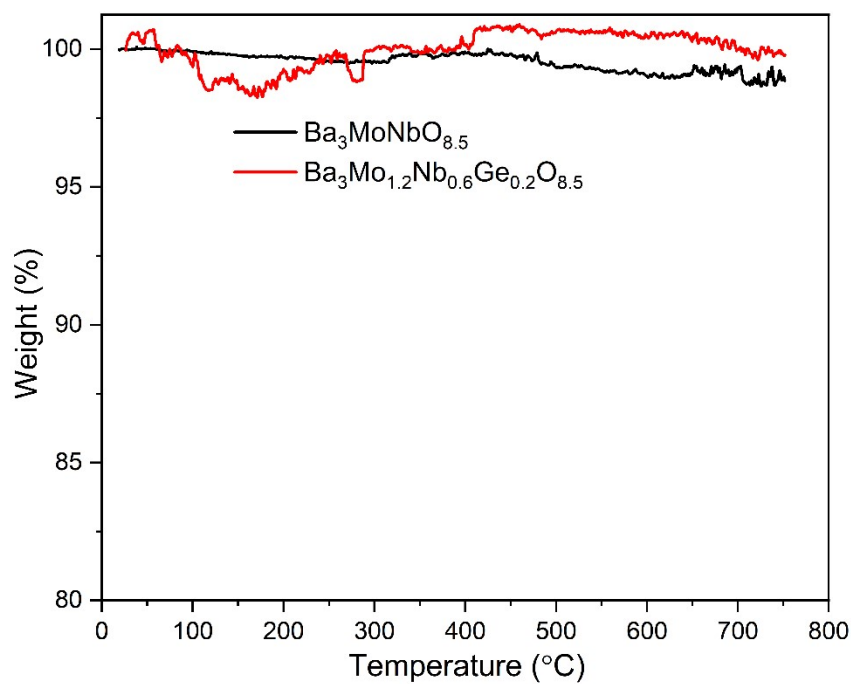

Figure S8. TGA curves for  $\text{Ba}_3\text{Mo}_{1+x}\text{Nb}_{1-2x}\text{Ge}_x\text{O}_{8.5}$  with  $x = 0$  and  $0.2$  measured under air atmospheres.

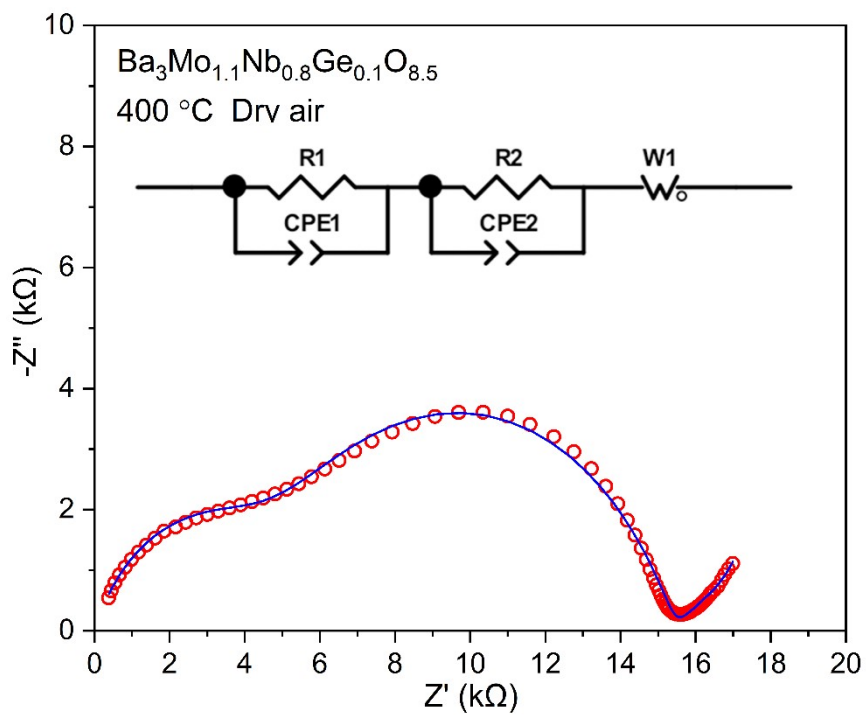

Figure S9. An impedance spectrum fit for  $\text{Ba}_3\text{Mo}_{1.1}\text{Nb}_{0.8}\text{Ge}_{0.1}\text{O}_{8.5}$ . The inset shows the equivalent circuit, where R, CPE, and W represent the resistor, constant phase element, and electrode response.

Table S1. The atomic coordinates, occupancies, anisotropic thermal displacement parameters, bond valence sums for  $\text{Ba}_3\text{Mo}_{1.4}\text{Nb}_{0.6}\text{Ge}_{0.2}\text{O}_{8.5}$  obtained from Rietveld refinement against neutron powder diffraction data.<sup>a</sup>

| Site                       | Ba1       | Ba2       | Mo1/Nb1/Ge1    | Mo2/Nb2   | O1         | O2        | O3        |
|----------------------------|-----------|-----------|----------------|-----------|------------|-----------|-----------|
| <i>x</i>                   | 0         | 0         | 0              | 0         | 0.17196(2) | 0         | 0.0836(4) |
| <i>y</i>                   | 0         | 0         | 0              | 0         | 0.34392(2) | 0.5       | 0.0097(8) |
| <i>z</i>                   | 0         | 0.2063(1) | 0.40052(5)     | 0.4716(9) | 0.1025(5)  | 0         | 0.3231(2) |
| BVS                        | 2.06      | 2.00      | 5.54/5.00/3.60 | 4.33/4.16 | -1.97      | -1.39     | -2.23     |
|                            |           |           | 0.5773(8)      |           |            |           |           |
|                            |           |           |                | 0.0247(8) |            |           |           |
| Occ.                       | 1         | 1         | 0.2877(4)      |           | 1          | 0.408(2)  | 0.1063(6) |
|                            |           |           |                | 0.0123(4) |            |           |           |
|                            |           |           | 0.1            |           |            |           |           |
| $U_{11}$ (Å <sup>2</sup> ) | 0.0232(2) | 0.0232(2) | 0.0140(2)      | 0.0094(4) | 0.0249(6)  | 0.0468(2) | 0.033(2)  |
| $U_{22}$ (Å <sup>2</sup> ) | 0.0232(2) | 0.0232(2) | 0.0140(2)      | 0.0094(4) | 0.0138(1)  | 0.0468(2) |           |
| $U_{33}$ (Å <sup>2</sup> ) | 0.0306(7) | 0.0306(7) | 0.0314(9)      | 0.0273(7) | 0.0186(9)  | 0.013(3)  |           |
| $U_{12}$ (Å <sup>2</sup> ) | 0.0116(3) | 0.0116(3) | 0.0070(3)      | 0.0047(2) | 0.0069(6)  | 0.0234(9) |           |
| $U_{13}$ (Å <sup>2</sup> ) | 0         | 0         | 0              | 0         | 0.0021(3)  | 0         |           |
| $U_{23}$ (Å <sup>2</sup> ) | 0         | 0         | 0              | 0         | 0.0010(2)  | 0         |           |

<sup>a</sup>The thermal factor of O3 was refined with a single *U* factor; For for O2 and the cations,  $U_{11} = U_{22} = 2U_{12}$ ,  $U_{13} = U_{23} = 0$ ; For O1,  $U_{22} = 2U_{12}$ ,  $U_{23} = 2U_{13}$ .



Table S2. Selected interatomic distances in Ba<sub>3</sub>Mo<sub>1.4</sub>Nb<sub>0.6</sub>Ge<sub>0.2</sub>O<sub>8.5</sub>.

| Bond         | Length (Å) | Bond       | Length (Å) |
|--------------|------------|------------|------------|
| M1/Ge-O3     | 1.699(4)   | Ba1-O1 × 6 | 2.7902(8)  |
| M1/Ge-O1 × 3 | 1.8143(8)  | Ba1-O2 × 6 | 2.9556(4)  |
| M1/Ge-O2 × 3 | 2.2189(9)  | Ba2-O3     | 2.520(4)   |
| M2-O1 × 3    | 1.805(8)   | Ba2-O1 × 3 | 2.801(2)   |
| M2-O1 × 3    | 2.58(2)    | Ba2-O1 × 6 | 3.0036(4)  |
